# Supplementary material for: Efficacy and safety of adjunctive lacosamide in the treatment of primary generalised tonic-clonic seizures: a double-blind, randomised, placebo-controlled trial
Source: PubMed Central journal article supplement — J Neurol Neurosurg Psychiatry. 2020 Aug 18;91(10):1067–75. doi: 10.1136/jnnp-2020-323524 (PMC7509528; doi:10.1136/jnnp-2020-323524), 2020-08-18
Supplement: jnnp-2020-323524supp001.pdf [file jnnp-2020-323524supp001.pdf]

## Supplemental Information

### Supplemental Methods

#### Additional eligibility criteria

To be eligible, patients were required to have had an electroencephalogram (EEG) report consistent with idiopathic generalised epilepsy. If patients had a vagus nerve stimulator implanted, it must have been in place for  $\geq 6$  months with a constant stimulator setting for  $\geq 28$  days before Visit 1 and during the Prospective Baseline and Treatment period. Patients were excluded if they had a history of focal-onset seizures or EEG findings indicative of focal-onset seizures, had symptomatic generalised epilepsy (epileptic encephalopathies) (eg, Lennox-Gastaut syndrome typically presenting with seizures including tonic seizures), some other related syndromes like Doose syndrome (typically presenting with myoclonic-atonic seizures), or evidence of both focal and generalised epilepsy, a history of convulsive status epilepticus 1 year before screening, or a current or previous diagnosis of pseudoseizures (psychogenic non-epileptic seizures), conversion disorders or other non-epileptic ictal events which could have been confused with seizures. In addition, patients were excluded if they had any medical or psychiatric condition which, in the opinion of the investigator, could have jeopardised their health or compromised their ability to participate in the trial, or had a history of suicide attempt or suicidal ideation in the past 6 months. Patients had to be withdrawn from the trial if they were unable to attain at least the minimum maintenance target dose, required a subsequent dose increase after dose reduction during the Maintenance period or required more than one dose reduction during the Maintenance period. Patients were withdrawn if they developed a second- or third-degree atrioventricular block, became pregnant, had a positive response for suicidal ideation on the Columbia-Suicide Severity Rating Scale (patients  $\geq 6$  years of age) or had liver function test results of transaminases  $\geq 3$  times the upper limit of normal (ULN) and total bilirubin  $\geq 2$  times ULN or transaminases  $\geq 5$  times ULN. Patients were further withdrawn if the sponsor or a regulatory agency requested withdrawal of the patient or if the patient was unwilling or unable to continue and withdrew consent.

#### Randomisation details

Treatment was assigned via an Interactive Response Technology (IRT) using a pre-determined randomisation schedule that was produced by the IRT vendor. All sponsor, investigator sites and other staff involved with the trial were blinded to the treatment code. The randomisation schedule was maintained in a secure location until the trial was unblinded. The IRT generated individual assignments for patient kits of trial medication according to the

visit schedule. Lacosamide oral solution and matching placebo were colourless to pale yellow in appearance and were packaged in identical bottles. Lacosamide and matching placebo tablets were white, oval tablets debossed with 'SP' on one side and were packaged in identical bottles.

#### Other outcomes

Other efficacy variables related to health outcomes were change from Baseline in Patient-Weighted Quality of Life in Epilepsy Inventory-Form 31 (QOLIE-31-P) total and subscale scores (patients  $\geq 18$  years) or change from Baseline in the PedsQL subscale and total scores (patients  $< 18$  years), change from Baseline to end of treatment in the 3-Level EuroQoL-5 Dimension Quality of Life Assessment (EQ-5D-3L) visual analogue scale score and change in utility as converted from the five dimensions (patients  $\geq 12$  years of age), healthcare resource use (medical procedures, hospitalisation and healthcare provider visits), number of working/school days lost by patients due to epilepsy, and number of days with help from a caregiver due to epilepsy.

Other safety outcomes were discontinuations due to adverse events, incidence of new seizure types during the Treatment period, patients with increase in the days with absence/myoclonic seizures per 28 days relative to the Prospective Baseline, changes in haematology, chemistry, endocrinology and urinalysis parameters, changes in 12-lead electrocardiograms (ECGs), vital sign measurements, and physical/neurological examinations, behavioural assessment (Achenbach Child Behavior Checklist [CBCL]/1½–5 or CBCL/6–18), and cognitive function assessment (BRIEF-P or BRIEF) for paediatric patients only.

#### Additional details of statistical analyses

The per-protocol set (PPS) was a subset of the FAS that excluded patients who completed  $< 6$  weeks of treatment and patients with important protocol deviations that could have affected interpretation of the primary efficacy analysis.

The primary outcome (time to second primary generalised tonic-clonic seizure [PGTCS] during 24-week Treatment period) was evaluated using a Cox proportional hazards regression model,<sup>1</sup> with an effect for treatment, stratifying for patients' baseline PGTCS frequency and age at informed consent (strata used:  $\leq 2$  PGTCS per 28 days and paediatric;  $\leq 2$  PGTCS per 28 days and adult;  $> 2$  PGTCS per 28 days). The stratified hazard ratio (HR) was calculated using the placebo group as reference, and 95% confidence intervals (CIs) for the HR were also reported. An HR  $< 1$  indicates a difference between the treatment groups favouring lacosamide over placebo. A Kaplan-Meier plot for time to event and Kaplan-Meier estimates for the median time to event and 95% CIs were provided. The number of events (for the Titration period [Day 42], first 12 weeks of the Treatment period [Day 84] and 24-week

Treatment period [Day 166]) as well as the percentage of patients who were censored (patients who completed the Treatment period without having a second PGTCS) were reported. Time to first PGTCS during the 24-week Treatment period was assessed similarly (without p-value).

Freedom from PGTCS for the 24-week Treatment period was evaluated using an extended Mantel-Haenszel testing procedure which considered that patients were initially stratified for their baseline PGTCS frequency and age at informed consent. The number and percentage of patients who experienced a PGTCS or censoring were presented for each stratum and overall. The stratified PGTCS freedom rate (and two-sided 95% CI) at Day 166 for each treatment group and the difference between treatment groups were presented. A gatekeeping strategy<sup>2</sup> was used to test the key secondary efficacy variable at the 5% significance level provided that the primary endpoint was statistically significant at the 5% level. If the primary endpoint failed to reach statistical significance, then the key secondary efficacy endpoint was exploratory only. Descriptive analyses were performed for all other efficacy and safety assessments.

Analyses of absence or myoclonic seizures were restricted to the subset of patients who reported a history of absence or myoclonic seizures or reported absence or myoclonic seizures during the Combined Baseline or the 24-week Treatment Period.

Treatment-emergent adverse events (TEAEs) were defined as adverse events that started (or whose intensity worsened) on or after the date of first dose of trial medication and within 30 days following the date of last trial medication administration. TEAEs were coded using the Medical Dictionary for Regulatory Activities (MedDRA) version 16.1.

## Supplemental Results

### Sensitivity analyses of the primary outcome

The results of all sensitivity analyses of time to second PGTCS were consistent with the primary analysis, including analyses based on the PPS (104 patients on lacosamide and 103 patients on placebo who completed at least 6 weeks of treatment and had no important protocol deviations; one patient in the lacosamide group was re-diagnosed with focal seizures during the trial and was excluded from the PPS) and full analysis set, analyses evaluating the effect of different types of discontinuations, and an analysis including all 126 events that occurred during the trial (one patient in the lacosamide group was randomised after the 125th event and not included in the primary analysis).

#### Additional safety, quality of life and health outcomes

There was no evidence for any clinically relevant effect of lacosamide treatment on clinical chemistry, endocrinology, haematology, or urinalysis laboratory parameters, vital signs, neurological examinations, Achenbach CBCL and BRIEF-P/BRIEF assessments. Mean and median changes from Baseline to last visit for all 12-lead ECG parameters were small, with the exception of mean change in PR interval, which was 9.96 ms with lacosamide versus -0.79 ms with placebo. No clinically relevant changes from Baseline were observed.

The incidence of TEAEs related to abnormal ECG findings was generally low and similar between lacosamide and placebo.

Changes from Baseline to last visit for QOLIE-31-P total and subscale scores, distress items, and prioritisation items, PedsQL and EQ-5D-3L quality of life visual analogue scale scores were generally small and variable with both lacosamide and placebo. No worsening was observed in any of the assessed health outcome measures.

#### References

1. Cox DR. Regression models and life-tables. *J R Stat Soc Series B Methodol* 1972;34:187–220.
2. Marcus R, Peritz E, Gabriel KR. On closed testing procedures with special reference to ordered analysis of variance. *Biometrika* 1976;63:655–60.

## Supplemental Tables

**Table S1 Epileptic syndrome and epilepsy aetiology (SS)**

|                                                                       | Placebo (n=121) | Lacosamide (n=121) |
|-----------------------------------------------------------------------|-----------------|--------------------|
| <b>Classification of epileptic syndrome*, n (%)</b>                   |                 |                    |
| Generalised idiopathic                                                | 121 (100)       | 121 (100)          |
| Benign neonatal convulsions                                           | 0               | 1 (0.8)            |
| Benign myoclonic epilepsy in infancy                                  | 0               | 1 (0.8)            |
| Childhood absence epilepsy                                            | 6 (5.0)         | 9 (7.4)            |
| Juvenile absence epilepsy                                             | 15 (12.4)       | 13 (10.7)          |
| Juvenile myoclonic epilepsy                                           | 42 (34.7)       | 34 (28.1)          |
| Epilepsy with grand mal seizures on awakening                         | 19 (15.7)       | 15 (12.4)          |
| Other generalised idiopathic epilepsies                               | 54 (44.6)       | 55 (45.5)          |
| Epilepsies with seizures precipitated by specific modes of activation | 6 (5.0)         | 6 (5.0)            |
| Generalised symptomatic                                               | 1 (0.8)         | 0                  |
| Other symptomatic generalised epilepsies                              | 1 (0.8)         | 0                  |
| Situation-related seizures                                            | 4 (3.3)         | 1 (0.8)            |
| <b>Aetiology of epilepsy, n (%)</b>                                   |                 |                    |
| Aetiology known                                                       | 18 (14.9)       | 17 (14.0)          |
| Genetic origin (familial epilepsy)                                    | 18 (14.9)       | 16 (13.2)          |
| Cranial trauma                                                        | 0               | 1 (0.8)            |
| Aetiology unknown                                                     | 103 (85.1)      | 104 (86.0)         |
| Idiopathic                                                            | 103 (85.1)      | 100 (82.6)         |
| Cryptogenic                                                           | 0               | 4 (3.3)            |

\*Patients could have more than one response in a classification level and/or category. SS, safety set.

**Table S2 Proportion of patients free from PGTCS at the end of the 24-week Treatment period (Day 166) (FAS)**

|                                                                                                 | Placebo (n=121)                          | Lacosamide (n=118)* |
|-------------------------------------------------------------------------------------------------|------------------------------------------|---------------------|
| <b>All patients</b>                                                                             |                                          |                     |
| Number of patients with a seizure, n (%)                                                        | 97 (80.2)                                | 79 (66.9)           |
| Number of patients censored <sup>†</sup> , n (%)                                                | 24 (19.8)                                | 39 (33.1)           |
| KM seizure-free (stratified) <sup>‡</sup> , % (95% CI)                                          | 17.2 (10.4 to 24.0)                      | 31.3 (22.8 to 39.9) |
| Difference between lacosamide and placebo<br>KM seizure-free (stratified) <sup>‡</sup> (95% CI) | 14.1 (3.2 to 25.1); p=0.011 <sup>§</sup> |                     |
| <b>≤2 PGTCS per 28 days at baseline and paediatric</b>                                          | n=21                                     | n=21                |
| Number of patients with a seizure, n (%)                                                        | 18 (85.7)                                | 16 (76.2)           |
| Number of patients censored <sup>†</sup> , n (%)                                                | 3 (14.3)                                 | 5 (23.8)            |
| KM seizure-free, % (95% CI)                                                                     | 14.3 (0.0 to 29.3)                       | 22.9 (4.4 to 41.3)  |
| <b>≤2 PGTCS per 28 days at baseline and adult</b>                                               | n=74                                     | n=72                |
| Number of patients with a seizure, n (%)                                                        | 56 (75.7)                                | 46 (63.9)           |
| Number of patients censored <sup>†</sup> , n (%)                                                | 18 (24.3)                                | 26 (36.1)           |
| KM seizure-free, % (95% CI)                                                                     | 22.3 (12.5 to 32.1)                      | 34.2 (23.0 to 45.5) |
| <b>&gt;2 PGTCS per 28 days at baseline</b>                                                      | n=26                                     | n=25                |
| Number of patients with a seizure, n (%)                                                        | 23 (88.5)                                | 17 (68.0)           |
| Number of patients censored <sup>†</sup> , n (%)                                                | 3 (11.5)                                 | 8 (32.0)            |
| KM seizure-free, % (95% CI)                                                                     | 4.9 (0.0 to 14.3)                        | 30.0 (11.3 to 48.7) |

\*One patient in the lacosamide group was randomised after the 125th event and does not appear in this analysis. <sup>†</sup>Patients censored before Day 166 (patients who did not have a seizure or did not stay in the trial for 166 days). <sup>‡</sup>Estimated by Mantel-Haenszel methods (taking into account the stratification for the following combinations of patients' baseline PGTCS frequency and age group: ≤2 PGTCS per 28 days in the Combined Baseline period and paediatric; ≤2 PGTCS per 28 days in the Combined Baseline period and adult; >2 PGTCS per 28 days in the Combined Baseline period); <sup>§</sup>Based on a chi-square test on one degree of freedom. CI, confidence interval; FAS, full analysis set; KM, Kaplan-Meier; PGTCS, primary generalised tonic-clonic seizure.

**Table S3 Percent change from Combined Baseline in PGTCs frequency per 28 days (FAS)**

|                                                                                      | Placebo (n=121)          | Lacosamide (n=119)       |
|--------------------------------------------------------------------------------------|--------------------------|--------------------------|
| PGTCs frequency per 28 days during Combined Baseline, median (range)                 | 1.24 (0.7 to 19.4)       | 1.25 (0.3 to 12.3)       |
| Percent change from Combined Baseline in PGTCs frequency per 28 days, median (range) |                          |                          |
| 6-week Titration                                                                     | -42.71 (-100.0 to 715.4) | -66.37 (-100.0 to 943.6) |
| 12-week Treatment*                                                                   | -55.69 (-100.0 to 715.4) | -71.33 (-100.0 to 943.6) |
| 24-week Treatment†                                                                   | -43.24 (-100.0 to 715.4) | -77.92 (-100.0 to 943.6) |

\*6-week Titration period + first 6 weeks of Maintenance period; †6-week Titration period + 18-week Maintenance period. FAS, full analysis set; PGTCs, primary generalised tonic-clonic seizure.

**Table S4 Percent change from Prospective Baseline in days with absence seizures and days with myoclonic seizures per 28 days (SS)**

| Absence seizures                                                                          | Placebo (n=42)      | Lacosamide (n=51)   |
|-------------------------------------------------------------------------------------------|---------------------|---------------------|
| Days with absence seizures per 28 days during Prospective Baseline, median (range)*       | 1.5 (0–28)          | 0.0 (0–28)          |
| Percent change from Prospective Baseline in days with absence seizures, median (range)†   | n=22                | n=22                |
| 6-week Titration                                                                          | -11.1 (-100 to 183) | -24.6 (-100 to 155) |
| 12-week Treatment‡                                                                        | -13.3 (-100 to 183) | -30.4 (-100 to 155) |
| 24-week Treatment§                                                                        | -15.3 (-100 to 183) | -30.1 (-100 to 155) |
| Myoclonic seizures                                                                        | Placebo (n=49)      | Lacosamide (n=47)   |
| Days with myoclonic seizures per 28 days during Prospective Baseline, median (range)*     | 1.0 (0 to 28)       | 2.0 (0 to 28)       |
| Percent change from Prospective Baseline in days with myoclonic seizures, median (range)† | n=25                | n=24                |
| 6-week Titration                                                                          | -51.8 (-100 to 57)  | -32.5 (-100 to 402) |
| 12-week Treatment‡                                                                        | -65.7 (-100 to 87)  | -43.8 (-100 to 402) |
| 24-week Treatment§                                                                        | -65.7 (-100 to 87)  | -54.6 (-100 to 402) |

\*Based on average seizure days over 28 days for patients who reported a history of absence/myoclonic seizures or an occurrence of absence/myoclonic seizures in the Combined Baseline or Treatment period; †Based on patients with absence/myoclonic seizure days during the Prospective Baseline; ‡6-week Titration period + first 6 weeks of Maintenance period; §6-week Titration period + 18-week Maintenance period. SS, safety set.

**Table S5 TEAEs by number of concomitant AEDs\* (SS)**

|                                                                                                                         | One concomitant AED |                   | Two concomitant AEDs |                   | Three concomitant AEDs |                   |
|-------------------------------------------------------------------------------------------------------------------------|---------------------|-------------------|----------------------|-------------------|------------------------|-------------------|
|                                                                                                                         | Placebo (n=44)      | Lacosamide (n=35) | Placebo (n=55)       | Lacosamide (n=62) | Placebo (n=21)         | Lacosamide (n=23) |
| <b>Any TEAEs, n (%)</b>                                                                                                 | 27 (61.4)           | 28 (80.0)         | 34 (61.8)            | 48 (77.4)         | 17 (81.0)              | 19 (82.6)         |
| <b>TEAEs<sup>†</sup> experienced during the Treatment period by ≥5% of all patients on placebo or lacosamide, n (%)</b> |                     |                   |                      |                   |                        |                   |
| Dizziness                                                                                                               | 2 (4.5)             | 7 (20.0)          | 4 (7.3)              | 15 (24.2)         | 1 (4.8)                | 6 (26.1)          |
| Somnolence                                                                                                              | 2 (4.5)             | 6 (17.1)          | 10 (18.2)            | 10 (16.1)         | 5 (23.8)               | 4 (17.4)          |
| Headache                                                                                                                | 5 (11.4)            | 5 (14.3)          | 5 (9.1)              | 5 (8.1)           | 2 (9.5)                | 7 (30.4)          |
| Nausea                                                                                                                  | 0                   | 3 (8.6)           | 5 (9.1)              | 7 (11.3)          | 2 (9.5)                | 2 (8.7)           |
| Vertigo                                                                                                                 | 0                   | 1 (2.9)           | 2 (3.6)              | 4 (6.5)           | 0                      | 3 (13.0)          |
| Nasopharyngitis                                                                                                         | 2 (4.5)             | 2 (5.7)           | 1 (1.8)              | 4 (6.5)           | 1 (4.8)                | 2 (8.7)           |
| Fatigue                                                                                                                 | 3 (6.8)             | 4 (11.4)          | 1 (1.8)              | 3 (4.8)           | 2 (9.5)                | 1 (4.3)           |
| Vomiting                                                                                                                | 0                   | 0                 | 1 (1.8)              | 5 (8.1)           | 0                      | 2 (8.7)           |

\*One patient on lacosamide had no concomitant AEDs at trial entry and one patient on placebo had five concomitant AEDs at trial entry; both were excluded from this analysis; <sup>†</sup>MedDRA (Version 16.1) preferred term. AED, antiepileptic drug; MedDRA, Medical Dictionary for Regulatory Activities; SS, safety set; TEAE, treatment-emergent adverse event.

## Supplemental Figure

**Figure S1 Kaplan-Meier estimates for time to first PGTCs (125 events) (FAS)**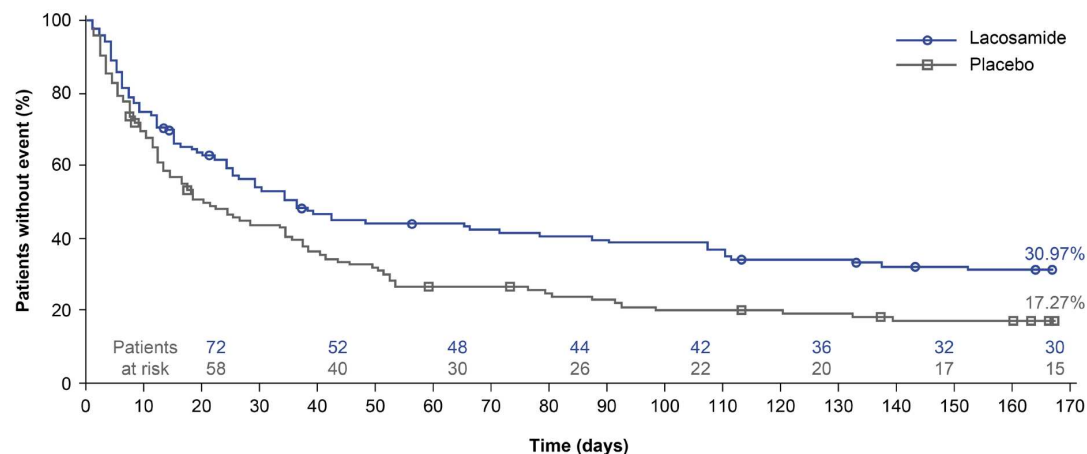

One patient in the lacosamide group was randomised after the 125th event and does not appear in this analysis. Symbols represent censored patients (patients who completed the Treatment period without having a first PGTCs). The cumulative number of events during the 24-week Treatment period (by Day 166) was 79 with lacosamide (Titration period [by Day 42]: 64; first 12 weeks of Treatment period [by Day 84]: 69) and 97 with placebo (Titration period [by Day 42]: 78; first 12 weeks of Treatment period [by Day 84]: 90). FAS, full analysis set; PGTCs, primary generalised tonic-clonic seizure.



## Co-investigator appendix

The authors acknowledge the SP0982 VALOR trial investigators for their contributions to data acquisition: Sami Aboumatar, MD (Austin Epilepsy Care Center, Austin, TX, USA); Naoki Akamatsu, MD (Fukuoka Sanno Hospital, Fukuoka, Japan); Soniza Alves-Leon, MD, PhD (Hospital Universitário Clementino Fraga Filho [HUCFF-UFRJ], Rio de Janeiro, Brazil); Prof Alexis Arzimanoglou (Hospices Civils de Lyon – Groupement Hospitalier Est - Hôpital Mère Enfant Epilepsie, Sommeil et Exp. Fonctionnelles Neuropédiatriques, Bron, France); Saeed Ata, MD (AS Clinical Research Consultants of North Texas PLLC, Greenville, TX, USA); Michal Bajaček, MUDr, PhD (Neurologická ambulance Forbeli s.r.o., Praha, Czech Republic); Michal Bar, MUDr, PhD (Cerebrovaskulární poradna s.r.o., Ostrava-Poruba, Czech Republic); Roy Beran, MD (Strategic Health Evaluators, Chatswood, Australia); Prof Samuel Berkovic (Epilepsy Research Centre, Melbourne Brain Centre, Austin Health, Heidelberg, Victoria, Australia); Dr Luiz Eduardo Betting (Hospital das Clínicas da Faculdade de Medicina de Botucatu - UNESP, Botucatu, Brazil); Ilan Blatt, MD (The Chaim Sheba Medical Center, Tel Hashomer, Israel); Dr Arnaud Biraben (CHRU de Rennes – Hôpital Pontchaillou, Service de Neurologie - Unité d'Epileptologie Vincent Van Gogh, Rennes, France); Victor Biton, MD (Clinical Trials, Inc., Little Rock, AR, USA); Prof Enver Bogdanov (Federal State Budgetary Educational Institution of Higher Education "Kazan State Medical University" of Ministry of Health of Russian Federation, Kazan, Russia); Jana Chamilova, MUDr (Inn Medic s.r.o., Bardejov, Slovakia); Yanhui Chen, MD (Fujian Medical University Union Hospital, Fuzhou, China); Yong Won Cho, MD (Keimyung University Dongsan Hospital, Daegu, South Korea); I-Ching Chou, MD (China Medical University Hospital, Taichung, Taiwan); Dr Mario Coletti Moja (Ospedale Mauriziano, Torino, Italy); Liliana Cucos, MD (Spitalul Clinic de Urgenta "Prof. Dr. Nicolae Oblu" Iasi, Iasi, Romania); Prof Anna Członkowska, MD, PhD (Instytut Psychiatrii i Neurologii, II Klinika Neurologiczna, Warszawa, Poland); Dr Veerle De Herdt (UZ Gent, Gent, Belgium); Prof Philippe Derambure (CHRU de Lille – Hôpital Roger Salengro, Lille, France); Nasrollah Eslami, MD (Neurology Neurodiagnostic Lab, LLC, Alabaster, AL, USA); Jose Carlos Estevez, MD (Hospital Universitario Reina Sofia, Córdoba, Spain); Viktor Farkas, MD, PhD (Semmelweis Egyetem I.sz, Gyermekgyógyászati Klinika, Csecsemő és Gyermekneurológiai, Budapest, Hungary); Bernardo Flasterstein, MD (Axxcess Medical Research LLC, Loxahatchee, FL, USA); Cassiano Mateus Forcelini, MD (Hospital São Vicente de Paulo, Passo Fundo, Brazil); Michael Frucht, MD (SSM Health Dean Medical Group, Madison, WI, USA); Waldemar Fryze, MD, PhD (Copernicus Podmiot Leczniczy Sp. z o.o. Oddział Neurologiczny, Gdańsk, Poland); Prof Feng Gao (The Children's Hospital, Zhejiang University School of Medicine, Hangzhou, China); Ronit Gilad, MD (Kaplan Medical Center, Rehovot, Israel); Prof Dr med Hajo Hamer (Universitätsklinikum Erlangen - Neurologische Klinik, Erlangen, Germany); Koji Iida, MD, PhD (Hiroshima University Hospital, Hiroshima, Japan); Hitoshi Ikeda, MD (Shizuoka Institute of Epilepsy and Neurological Disorders, Shizuoka, Japan); Atsushi Imamura, MD (Gifu Prefectural General Medical Center, Gifu,

Japan); Yuwu Jiang, MD (Peking University First Hospital, Beijing, China); Roman Kalinowski, MD (NZOZ Poradnia Zdrowia Psychicznego Antonijczuk Bolesław, Tyniec Mały, Poland); Janusz Kapustecki, MD, PhD (Anna Kapustecka Prywatna Przychodnia Specjalistyczna STOMED, Częstochowa, Poland); Sasho Kastrev, MD (MHAT "PULS" AD, Blagoevgrad, Bulgaria); Dong Wook Kim, MD (Konkuk University Medical Center, Seoul, South Korea); Heung Dong Kim, MD (Yonsei University Health System, Severance Hospital, Seoul, South Korea); Pavel Klein, MD (Mid-Atlantic Epilepsy and Sleep Center, Bethesda, MD, USA); Pedro Kowacs, MD (Instituto de Neurologia de Curitiba, Curitiba, Brazil); Jacek Kowalski, MD, PhD (VITO-MED Sp. z o.o., Oddział Neurologii, Gliwice, Poland); Yuichi Kubota, MD (TMG Asaka Medical Center, Asaka, Japan); David Kudrow, MD (Neurological Research Institute, Santa Monica, CA, USA); Prof Patrick Kwan (The Royal Melbourne Hospital, Parkville, Victoria, Australia); Wang-Tso Lee, MD, PhD (National Taiwan University Hospital, Taipei, Taiwan); Dr Benjamin Legros (ULB Erasme, Anderlecht, Belgium); George Li, MD (Medsol Clinical Research Center, Harbor Professional Center, Port Charlotte, FL, USA); Kátia Lin, MD (Hospital Universitário da Universidade Federal de Santa Catarina [HU-UFSC], Florianópolis, Brazil); Lubomír Lipovský, MUDr, PhD (Poliklinika a Lekárěň u sv. Michala, Hlohovec, Slovakia); Dr Carmen Gabriela Lupusoru (Spitalul Clinic de Psihiatrie Socola Iasi, Iasi, Romania); Edward Maa, MD (Denver Health Medical Center, Denver, CO, USA); Prof Louis Maillard (CHU de Nancy – Hôpital Central, Service de Neurologie, Nancy, France); Prof Dimitar Maslarov, MD, PhD (First MHAT – Sofia, Sofia, Bulgaria); Prof Natalia Maslova, MD, PhD (Federal State Budgetary Educational Institution of Higher Education “Smolensk State Medical University” of Ministry of Health of Russian Federation, Smolensk, Russia); Anatol Mickielewicz, MD (Centrum Medyczne Pratia Warszawa, Warszawa, Poland); Dr Gennadiy Mishin (State Budget Healthcare Institution of Stavropol Region “Pyatigorsk City Clinical Hospital #2”, Pyatigorsk, Russia); Hugo Ceja Moreno, MD (Hospital 278, Col. El Retiro, Guadalajara, Mexico); Lola Morgan, MD (University of Texas Health Science Center at San Antonio, San Antonio, TX, USA); Dr Ewa Motta (Centrum Medyczne “DENDRYT”, Katowice, Poland); Najib Murr, MD (Southern Illinois University, School of Medicine, Springfield, IL, USA); Eiji Nakagawa, MD, PhD (National Center of Neurology and Psychiatry, Tokyo, Japan); Dr Victoria Nekrasova (Medical Diagnostic Center of the International Institute of Biological Systems named after Sergey Berezin, Saint Petersburg, Russia); Michael Newmark, MD (Kelsey-Seybold Clinic, Houston, TX, USA); Yu-Tze Ng, MD (Children’s Hospital of San Antonio, Clinical Research Center, San Antonio, TX, USA); Hirotomo Ninomiya, MD (Itami City Hospital, Hyogo, Japan); Dr med Soheyl Noachtar (Klinikum der Universität München, Neurologische Klinik, München, Germany); Liliana Maria Nussbaum, MD (Spitalul Clinic de Urgenta pentru Copii Louis Turcanu, Timisoara, Romania); Teiichi Onuma, MD (Musashino Kokubunji Clinic, Tokyo, Japan); Ilona Pałka-Kisielowska, MD (Centrum Medyczne Pratia Katowice, Katowice, Poland); André Luis Palmiini, MD (Hospital São Lucas da PUCRS, Porto Alegre, Brazil); Dr med Axel Panzer (DRK Kliniken Berlin Westend, Epilepsie-Zentrum /

Neuropädiatrie, Berlin, Germany); Jaime Parra, MD, PhD (Hospital San Rafael – Madrid, Madrid, Spain); Prof José Pimentel (Centro Hospitalar Lisboa Norte, EPE – Hospital de Santa Maria, Lisbon, Portugal); Prof Irina Poverennova, MD, PhD (State Budgetary Healthcare Institution “Samara Regional Clinical Hospital named after V.D Seredavin”, Samara, Russia); R Eugene Ramsay, MD (The International Center for Epilepsy, Ochsner Medical Center, New Orleans, LA, USA); Juan Jesus Rodríguez Uranga, MD (Centro de Neurología Avanzada, Sevilla, Spain); Joanne Rogin, MD (Minneapolis Clinic of Neurology, Midwest Center for Seizure Disorders, Golden Valley, MN, USA); William Rosenfeld, MD (The Comprehensive Epilepsy Care Center for Children and Adults, Saint Louis, MO, USA); Estevo Santamarina, MD, PhD (Hospital Vall d’Hebrón, Barcelona, Spain); Mona Sazgar, MD (University of California Irvine Medical Center, Irvine, CA, USA); Prof Dr med Andreas Schulze-Bonhage (University Hospital Freiburg, Epilepsy Center in Neurocenter, Freiburg, Germany); Pedro Serrano, MD, PhD (Hospital Regional Universitario de Málaga, Málaga, Spain); Baljeet Sethi, MD (The Neurology Clinic, PC, Waldorf, MD, USA); Jerry Shih, MD (Mayo Clinic, Jacksonville, FL, USA); Hideaki Shiraiishi, MD, PhD (Hokkaido University Hospital, Sapporo, Japan); Dr Nataliya Sivakova (Federal State Budgetary Institution “National Medical Psychiatry and Neurology Research Center n. a. V. M. Bekhterev”, Saint Petersburg, Russia); Lech Szczechowski, MD, PhD (NZOZ Wielospecjalistyczna Poradnia Lekarska Synapsis, Katowice, Poland); Mutaz Tabbaa, MD, FACP (Bay Neurological Institute, Panama City, FL, USA); Shigeki Tanaka, MD (National Hospital Organization, Nagasaki Medical Center, Omura, Japan); Shigeya Tanaka, MD (Tanaka Neurosurgical Clinic, Kagoshima, Japan); Jun Tohyama, MD (Nishi-Niigata Chuo National Hospital, Niigata, Japan); Dr Wim Van Paesschen (Universitair Ziekenhuis Leuven, Leuven, Belgium); Blanca Vazquez, MD (NYU Comprehensive Epilepsy Center, New York, NY, USA); Prof László Vécsei, MD, PhD (Szegedi Tudományegyetem Szent, Györgyi Albert Klinikai Központ, Neurológiai Klinika, Szeged, Hungary); Larisa Volkova, PhD (State Budget Healthcare Institution of Sverdlovsk region Sverdlovsk regional clinical hospital #1, Ekaterinburg, Russia); Kimberly Wagner, MD (Colorado Springs Neurological Associates, Colorado Springs, CO, USA); Prof Xuefeng Wang (The First Affiliated Hospital of Chongqing Medical University, Chongqing, China); Yi Wang, MD (Children’s Hospital of Fudan University, Shanghai, China); Zan Wang, MD (The First Hospital of Jilin University, Changchun, China); Robert Wechsler, MD, PhD, FAAN (Consultants in Epilepsy and Neurology, PLLC, Boise, ID, USA); Aleksandra Wójcik-Pokora, MD (Centrum Medyczne Pratia Gdynia, Gdynia, Poland); Michael Xu, MD, PhD (Saint Francis Medical Center, Peoria, IL, USA); Elza Márcia Yacubian, MD (Universidade Federal de São Paulo [UNIFESP] – Hospital São Paulo, São Paulo, Brazil); Takamichi Yamamoto, MD, PhD (Seirei Hamamatsu General Hospital, Hamamatsu, Japan); William Yorns Jr, DO (Associated Neurologists – Danbury, Danbury, CT, USA); Monika Záhúmenská, MUDr (Neurologická ordinace, Zlín, Czech Republic); Jana Zarubova, MUDr (Affidea Praha s.r.o, Neurologická ambulance, Praha, Czech Republic).
